# Supplementary material for: MicroRNA-199b-5p Impairs Cancer Stem Cells through Negative Regulation of HES1 in Medulloblastoma
Source: PubMed Central journal article supplement (PMC2656623; doi:10.1371/journal.pone.0004998), 2009-03-24

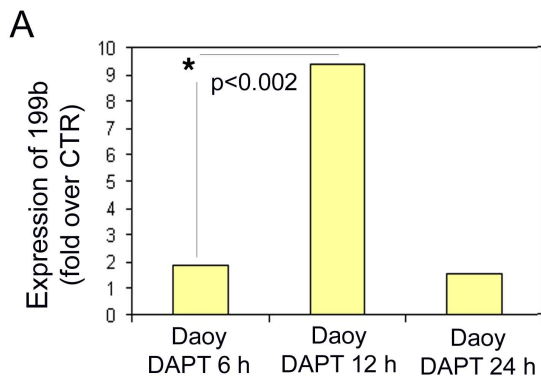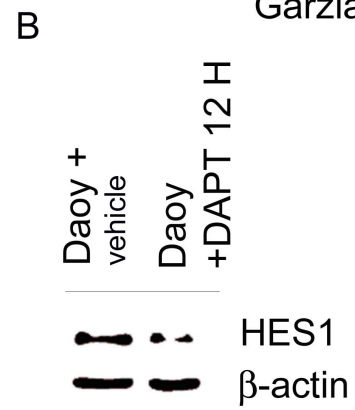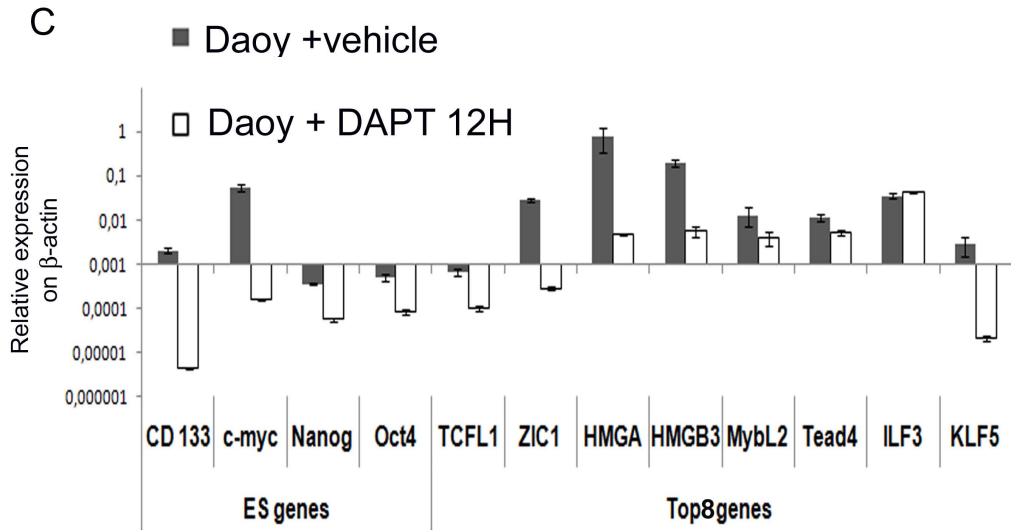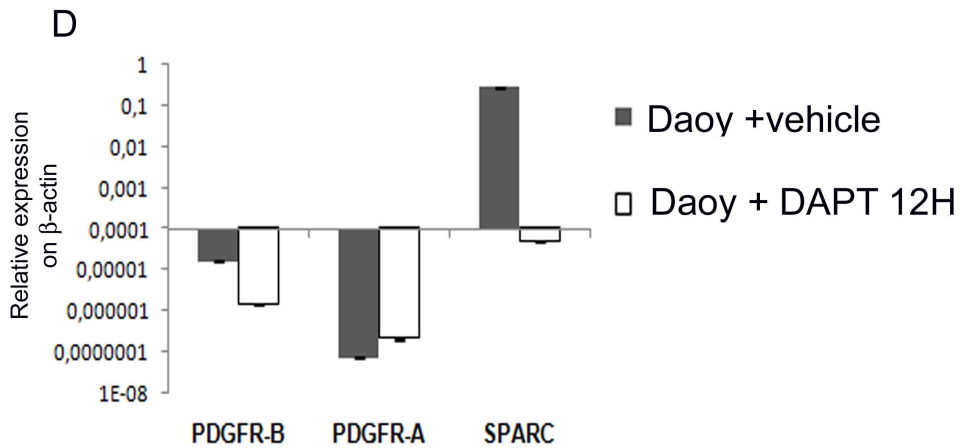

Supplement: pone.0004998.s006.pdf [file pone.0004998.s006.pdf]
